# Supplementary material for: Passerini chemistries for synthesis of polymer pro-drug and polymersome drug delivery nanoparticles
Source: Royal Society of Chemistry journal article supplement (doi:10.1039/d2tb00045h), 2022-01-01
Supplement: d2tb00045h1.pdf [file d2tb00045h1.pdf]

## Passerini chemistries for synthesis of polymer pro-drug and polymersome drug delivery nanoparticles

Alessandra Travanut,<sup>a</sup> Patrícia F. Monteiro,<sup>a</sup> Sean Smith,<sup>b</sup> Steven M. Howdle,<sup>b</sup> Anna M. Grabowska,<sup>c</sup> Barrie Kellam,<sup>a</sup> Michael A. R. Meier,<sup>d</sup> and Cameron Alexander.<sup>a\*</sup>

### Table of Contents

|                                                                               |    |
|-------------------------------------------------------------------------------|----|
| Materials.....                                                                | 1  |
| Synthetic procedures and spectroscopic data.....                              | 1  |
| Synthesis of methyl 12-isocyanododecanoate (3) [1].....                       | 1  |
| Synthesis of but-3-en-1-yl 12-isocyanododecanoate (4).....                    | 3  |
| Synthesis of AB-Type monomer (5) [1].....                                     | 4  |
| Synthesis of P1 – Passerini-3CR polymerization[2].....                        | 5  |
| Synthesis of P2 – Passerini-3CR polymerization [2].....                       | 5  |
| P2 Oxidation to P3 via ozonolysis.....                                        | 7  |
| Synthesis of P1-Cy5 and P3-Cy5.....                                           | 9  |
| Synthesis of P4-Dox.....                                                      | 10 |
| Formulation and characterization.....                                         | 11 |
| P1-Dox POLYMERSOMES FORMULATION.....                                          | 11 |
| P3-Cy5 AND P4-Dox NANOPARTICLES FORMULATION.....                              | 12 |
| P1-Dox AND P4-Dox POLYMERSOMES DRUG LOADING AND ENCAPSULATION EFFICIENCY..... | 12 |
| P1-Dox AND P4-Dox IN VITRO DRUG RELEASE.....                                  | 13 |
| Cell culture experiments.....                                                 | 13 |
| CELLULAR UPTAKE STUDIES WITH P1-Cy5 AND P3-CY5 NANOPARTICLES.....             | 13 |
| 3D tumor TNBC spheroids.....                                                  | 14 |
| Statistical analysis.....                                                     | 16 |
| References.....                                                               | 16 |
| Author Contributions.....                                                     | 17 |

### Materials

The following chemicals were used as received: trimethyl orthoformate (≥99%, Aldrich), thionyl chloride (≥97%, Aldrich), diisopropylamine (≥99%, Aldrich), phosphorus(V) oxidychloride (≥99%, Aldrich), 10-undecenal (≥90%, Aldrich), 3-mercaptopropionic

### Synthetic procedures and spectroscopic data

#### Synthesis of methyl 12-isocyanododecanoate (3) [1]

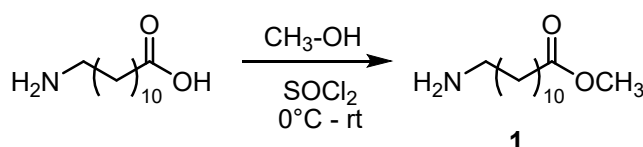

Scheme S 1: methoxy protection of 12-aminododecanoic acid carboxylic group.

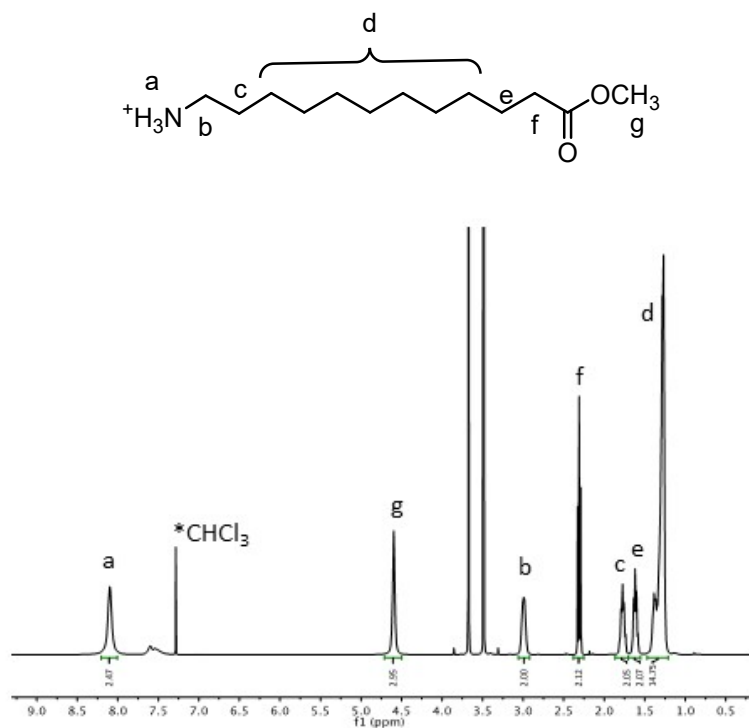

Figure S 1:  $^1\text{H}$  NMR of 12-methoxy-12-oxododecan-1-aminium (1) in  $\text{CDCl}_3$ .

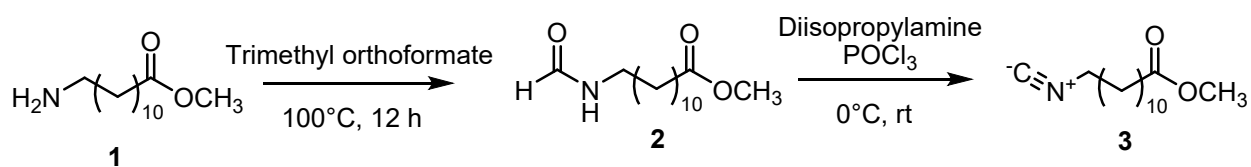

Scheme S 2: synthetic route of methyl 12-isocyanododecanoate (3): formylation of 12-methoxy-12-oxododecan-1-aminium amino group (1) and final dehydration to methyl 12-isocyanododecanoate (3).

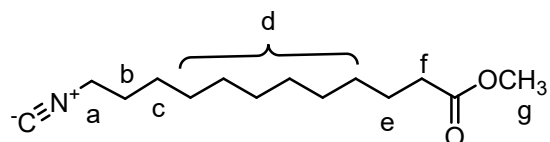

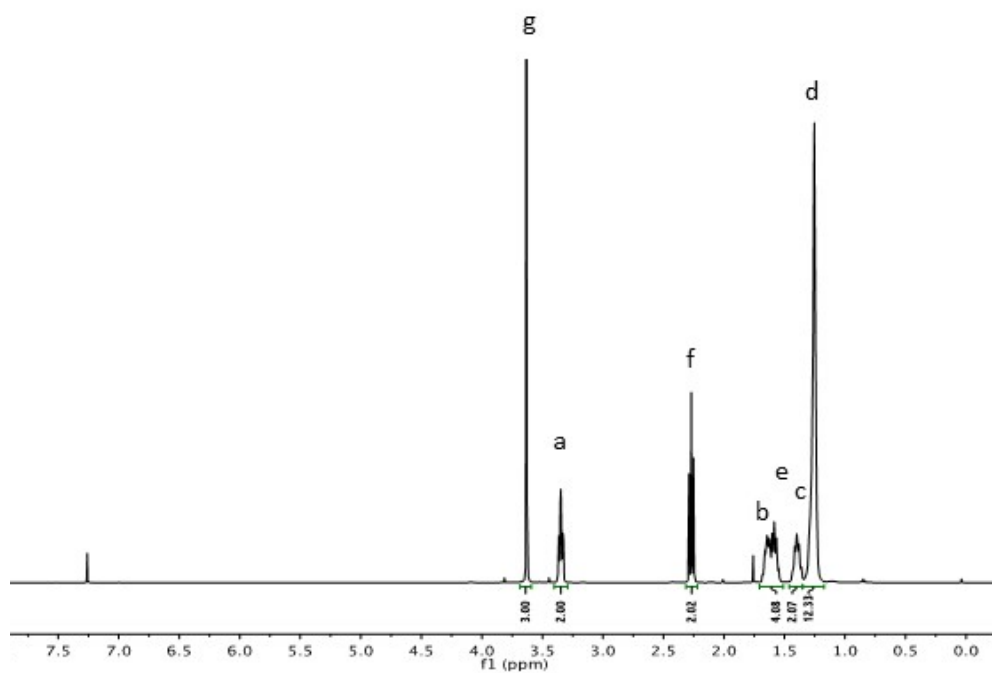

Figure S 2:  $^1\text{H}$  NMR of methyl 12-isocyanododecanoate (**3**) in  $\text{CDCl}_3$ .

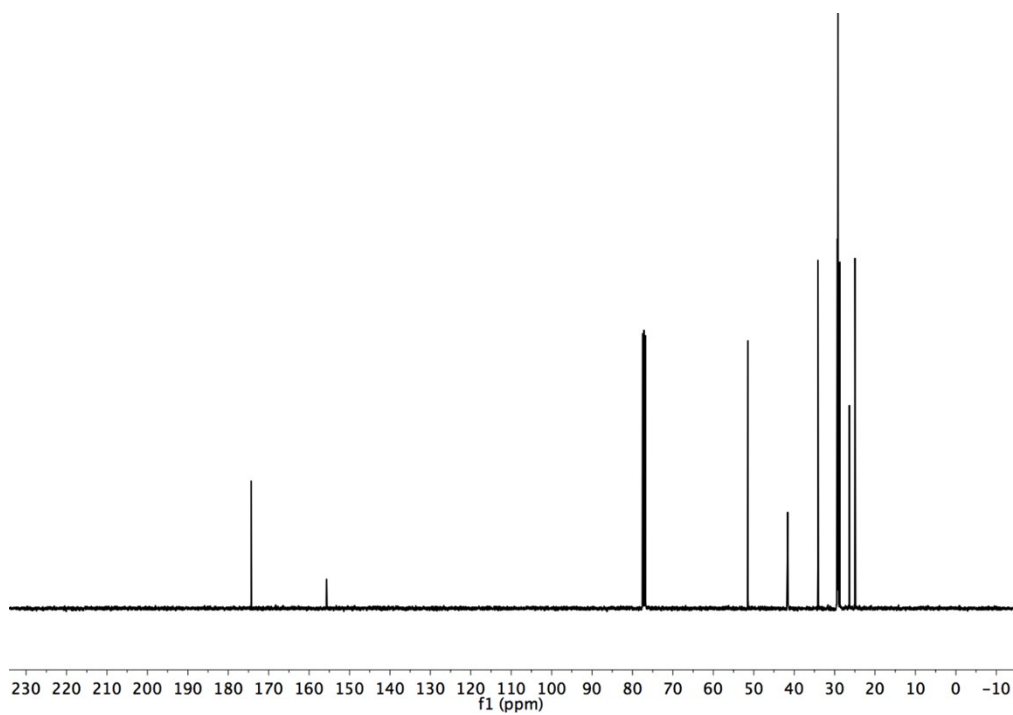

Figure S 3:  $^{13}\text{C}$  NMR of methyl 12-isocyanododecanoate (**3**) in  $\text{CDCl}_3$ .

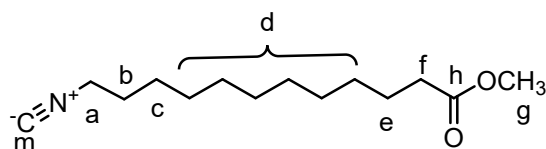

**Synthesis of but-3-en-1-yl 12-isocyanododecanoate (**4**)**

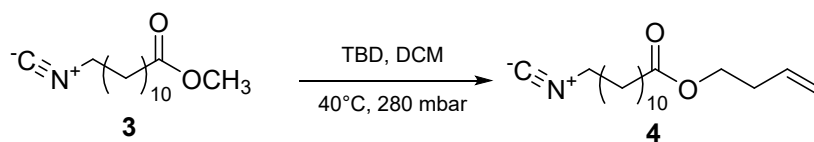

**Scheme S 3:** Synthesis of but-3-en-1-yl 12-isocyanododecanoate (4) starting from methyl 12-isocyanododecanoate (3).

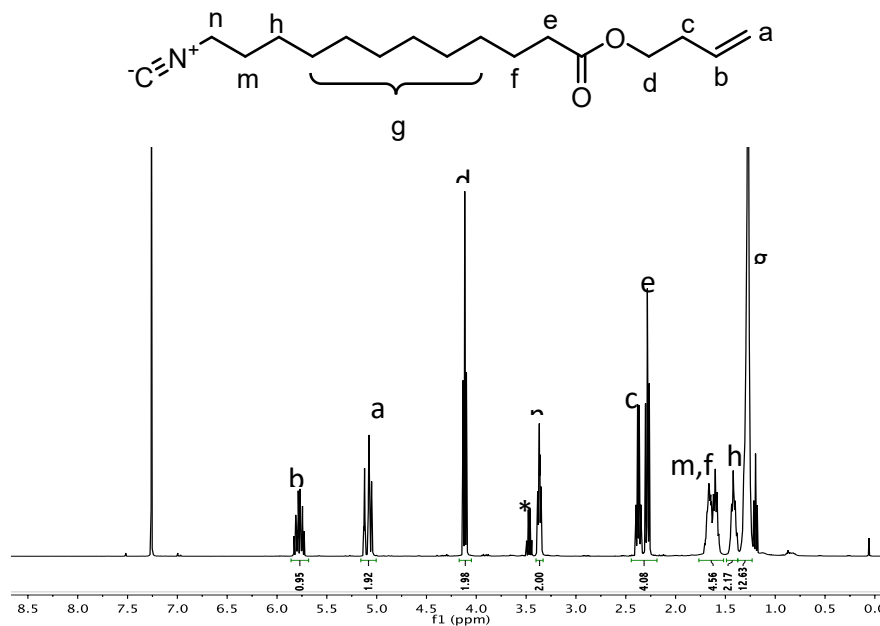

**Figure S 4:**  $^1\text{H}$  NMR of but-3-en-1-yl 12-isocyanododecanoate (4) in  $\text{CDCl}_3$ ; \* diethyl ether.

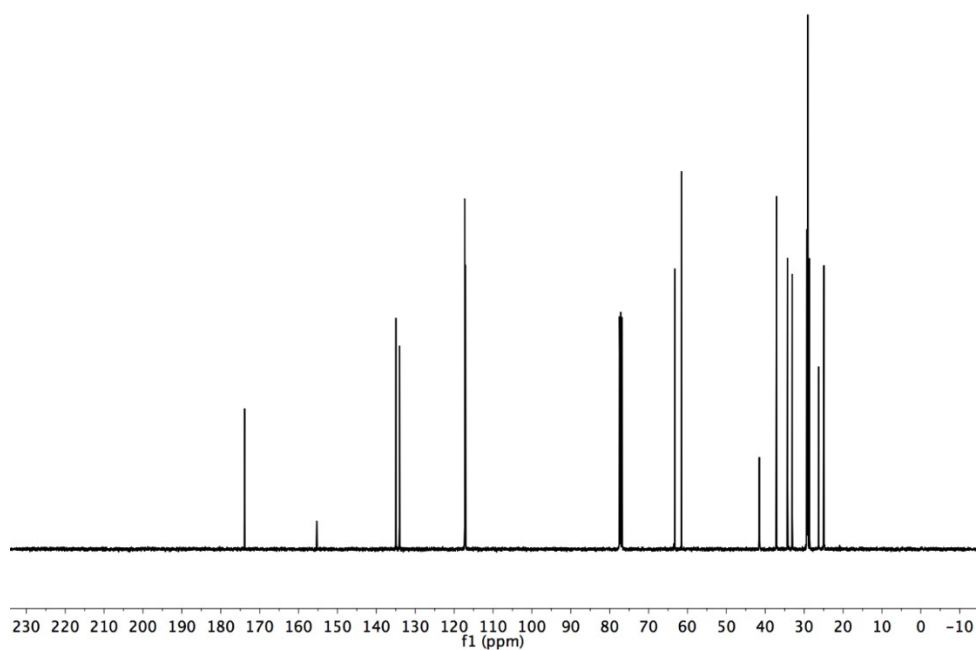

**Figure S 5:**  $^{13}\text{C}$  NMR of but-3-en-1-yl 12-isocyanododecanoate (4) in  $\text{CDCl}_3$ .

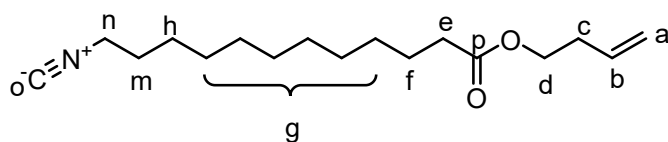

### Synthesis of AB-Type monomer (5) [1]

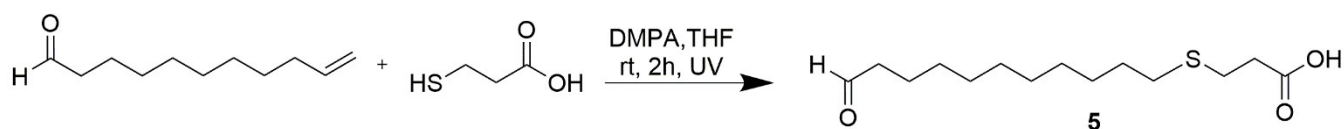

**Scheme S 4:** synthesis of AB-type monomer (5) via thiol-ene reaction

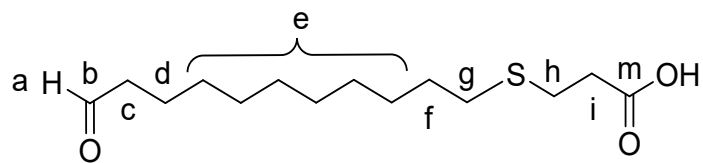

**Synthesis of P1 – Passerini-3CR polymerization[2]**

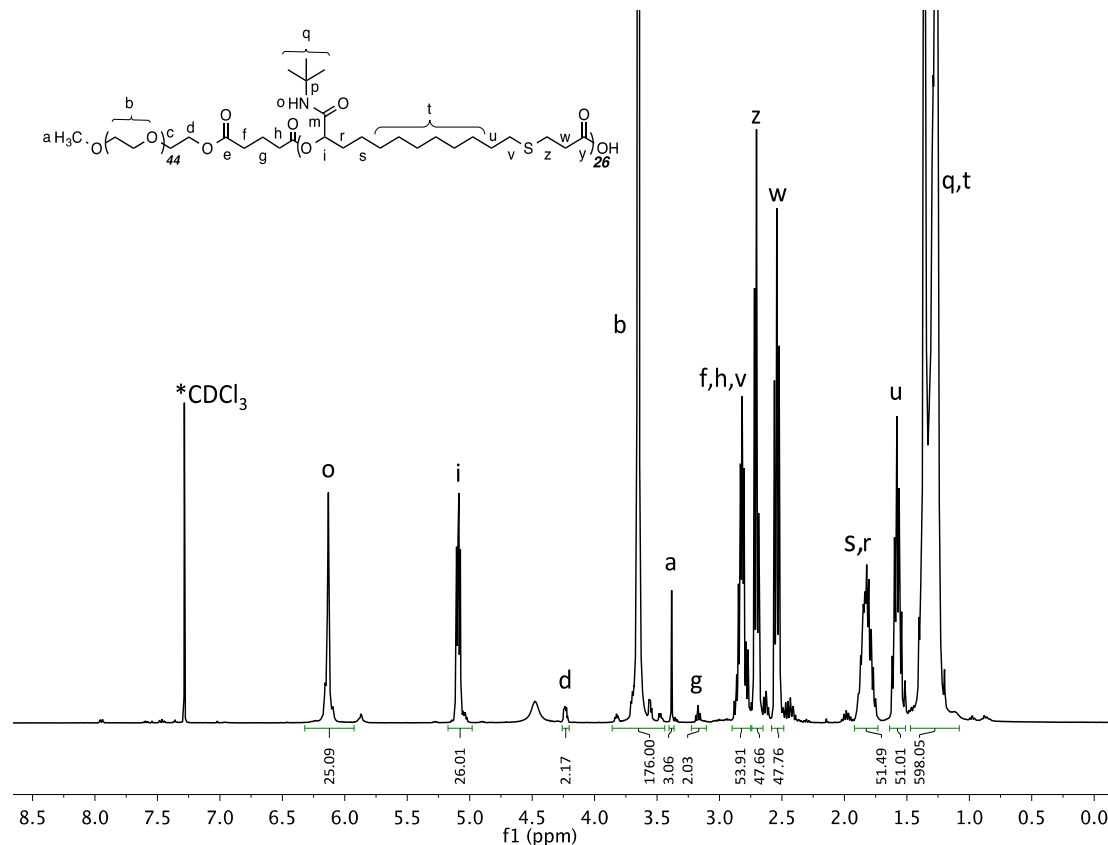

**Figure S 6:** Integrated  $^1\text{H}$  NMR spectrum of Passerini diblock copolymer **P1** in  $\text{CDCl}_3$

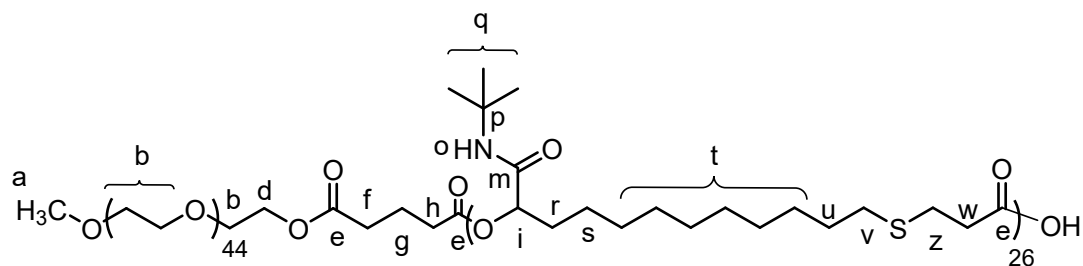

**Synthesis of P2 – Passerini-3CR polymerization [2]**

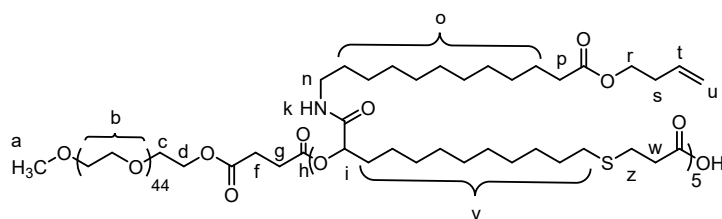

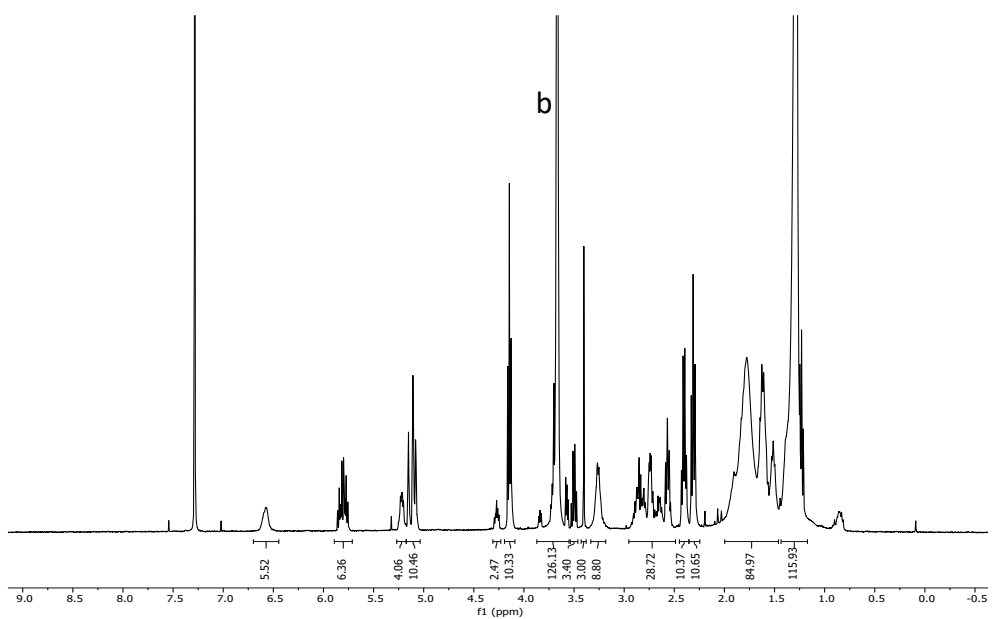

Figure S 7: Integrated  $^1\text{H}$  NMR spectrum of Passerini diblock copolymer **P2** in  $\text{CDCl}_3$

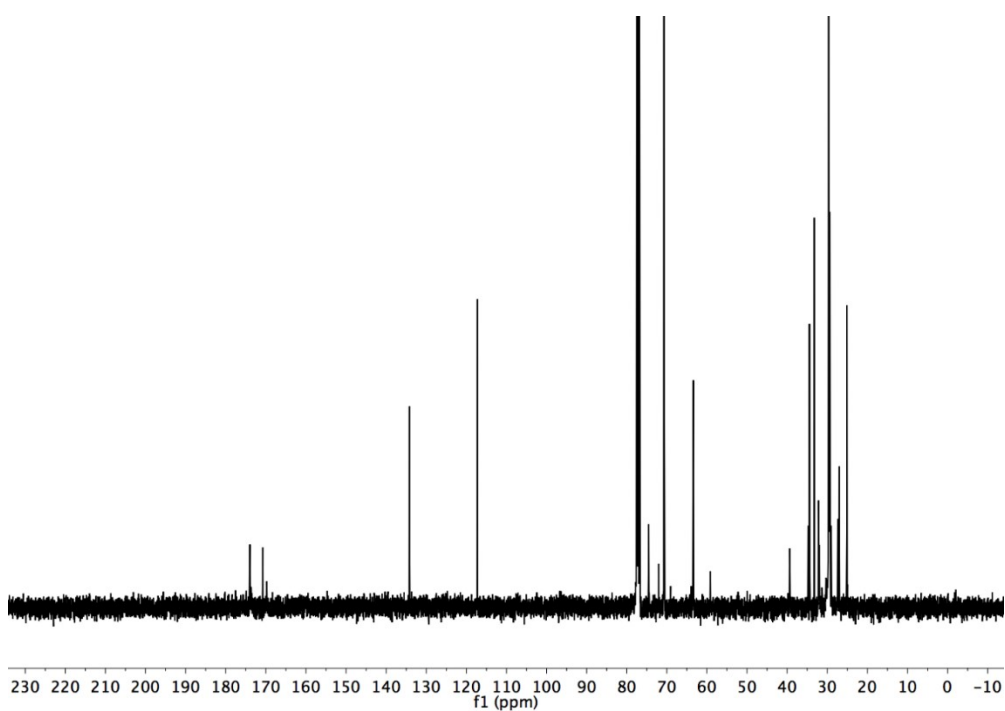

Figure S 8:  $^{13}\text{C}$  NMR of **P2** in  $\text{CDCl}_3$ .

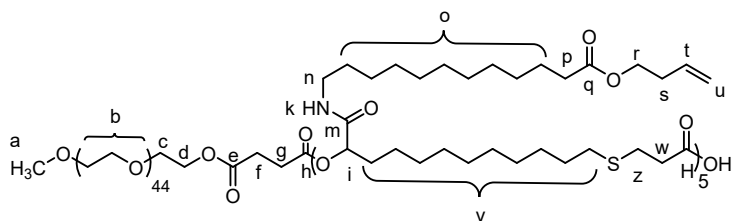

**P2 Oxidation to P3 via ozonolysis**

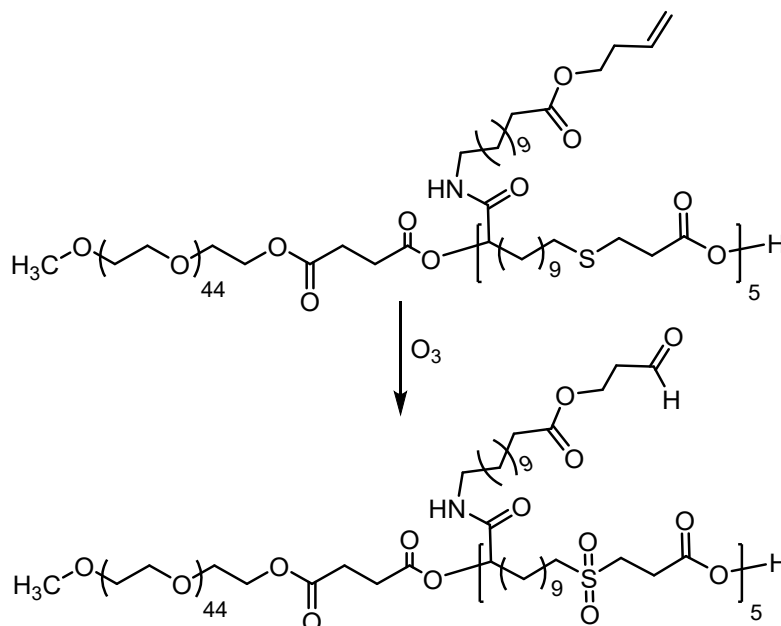

**Scheme S 5:** Ozonolysis reaction scheme of P2 Passerini diblock copolymer to yield P3 Passerini diblock copolymer.

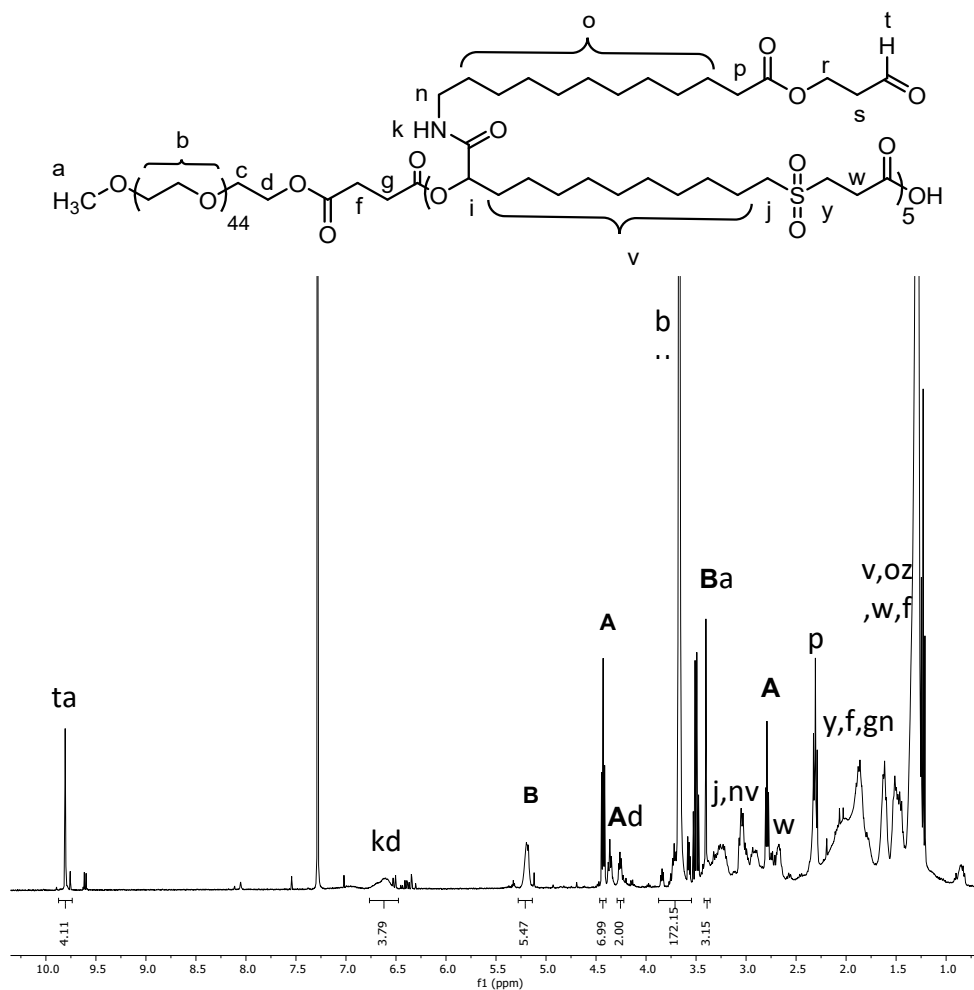

**Figure S 9:** Integrated  $^1H$  NMR spectrum of Passerini diblock copolymer P3 in  $CDCl_3$ .

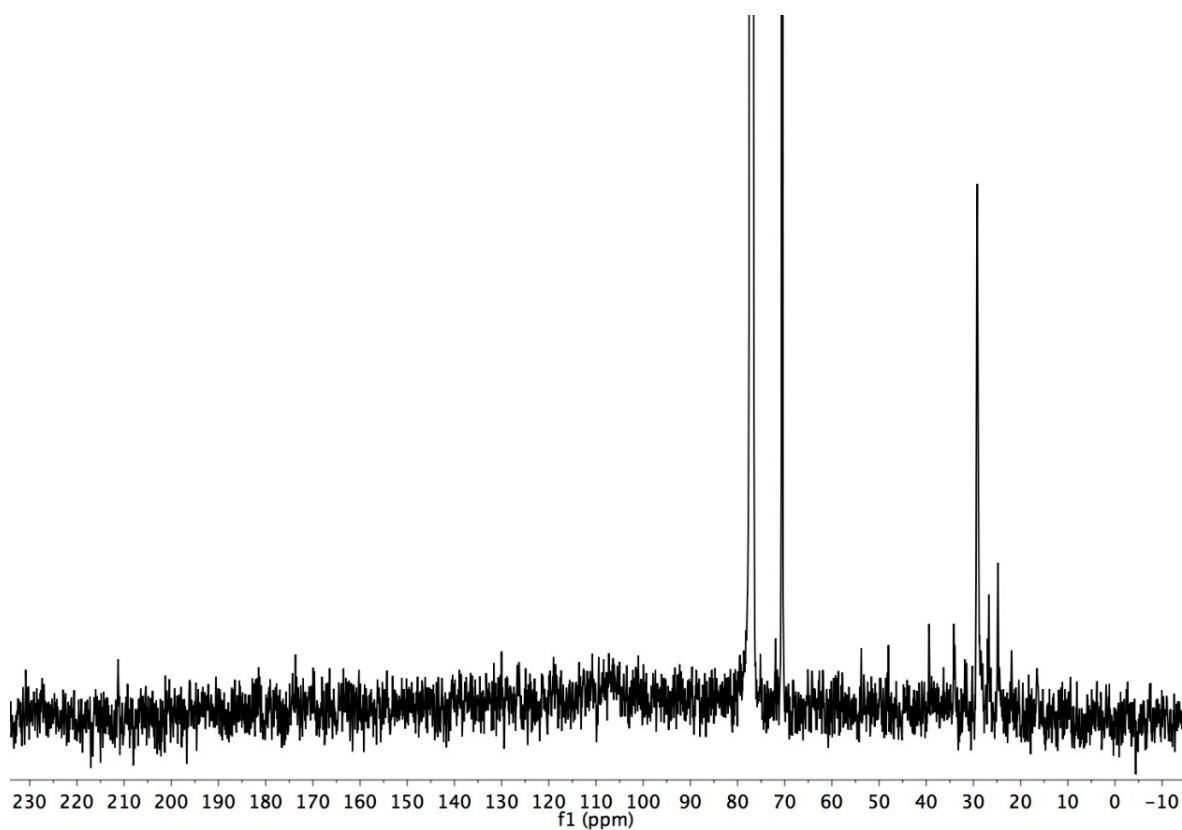

Figure S 10:  $^{13}\text{C}$  NMR of P3 in  $\text{CDCl}_3$ .

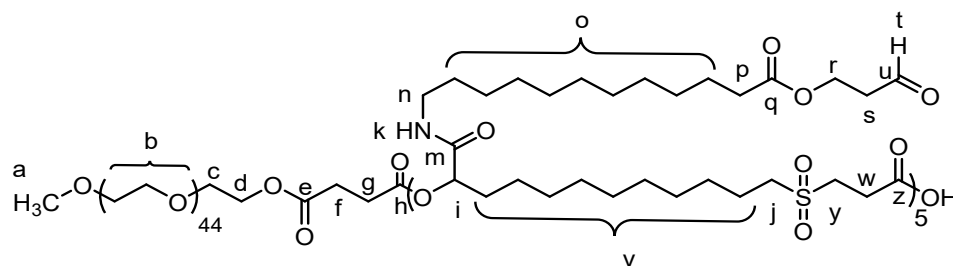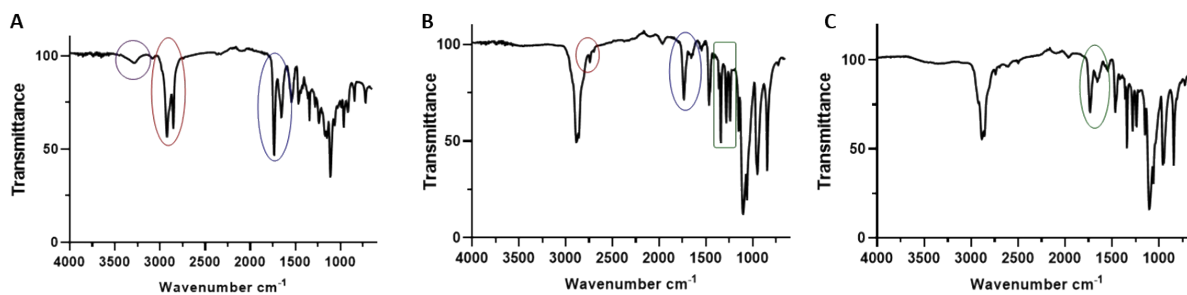

Figure S 11: (A) FT-IR characterization spectrum of Passerini P2 diblock copolymer, C-H stretches at  $3280$  and  $2920$   $\text{cm}^{-1}$ , C=C stretch at  $1653$   $\text{cm}^{-1}$ , C=O stretch at  $1734$   $\text{cm}^{-1}$ . (B) FT-IR characterization spectrum of Passerini P3 diblock copolymer, aldehyde group stretching at  $2790$   $\text{cm}^{-1}$  and sulfone stretches at  $1239$ ,  $1278$  and  $1339$   $\text{cm}^{-1}$ . (C) FT-IR characterization spectrum of Passerini P4-Dox prodrug, C=O stretch at  $1734$   $\text{cm}^{-1}$  and imine stretch at  $1654$   $\text{cm}^{-1}$ .



## Synthesis of P1-Cy5 and P3-Cy5

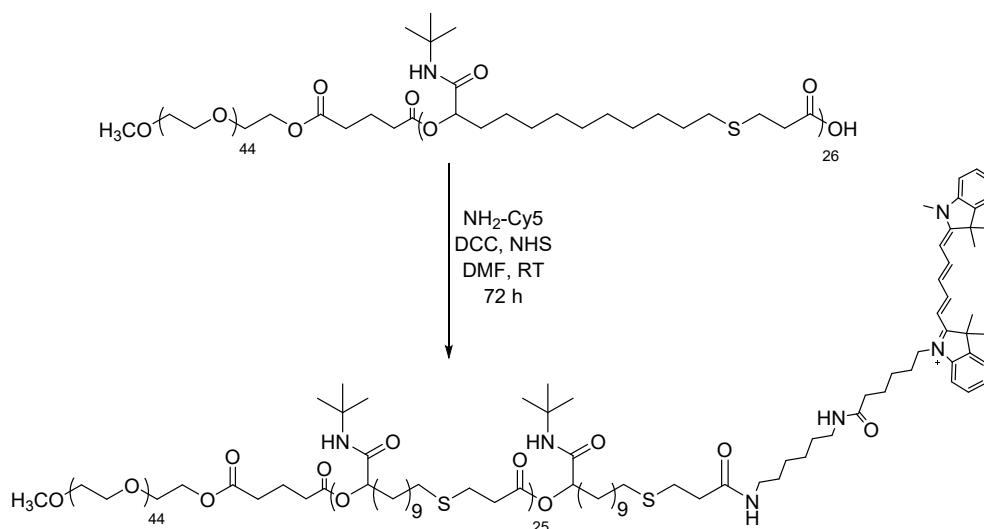

Scheme S 6: P1 Passerini diblock copolymer Cy5 conjugation reaction scheme.

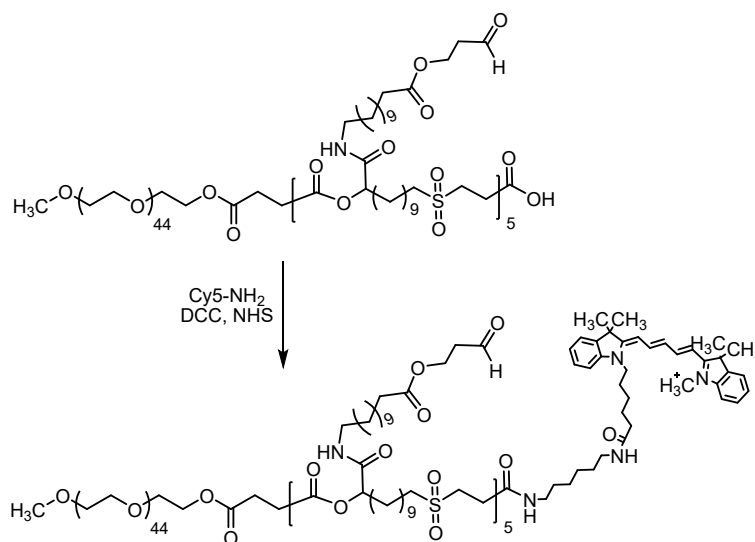

Scheme S 7: Reaction scheme of P3 Passerini diblock copolymer conjugation reaction with amino Cy5.

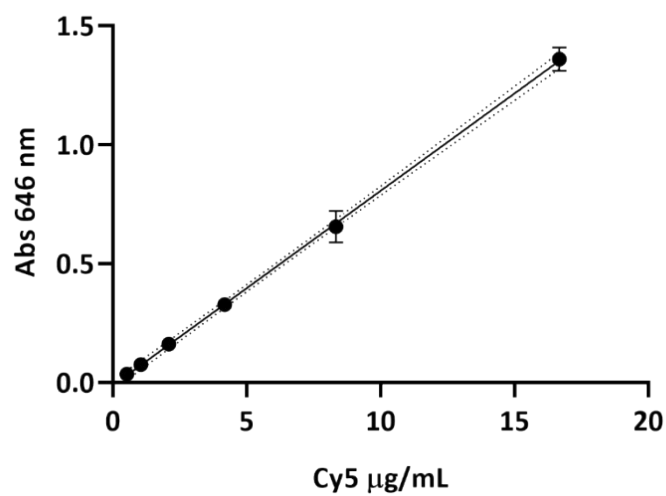

Figure S 12:  $\text{Cy5-NH}_2$  calibration curve in water 10% DMF:  $Y = 0.08188X - 0.01184$ ,  $R^2 = 0.99$ .

# Synthesis of P4-Dox

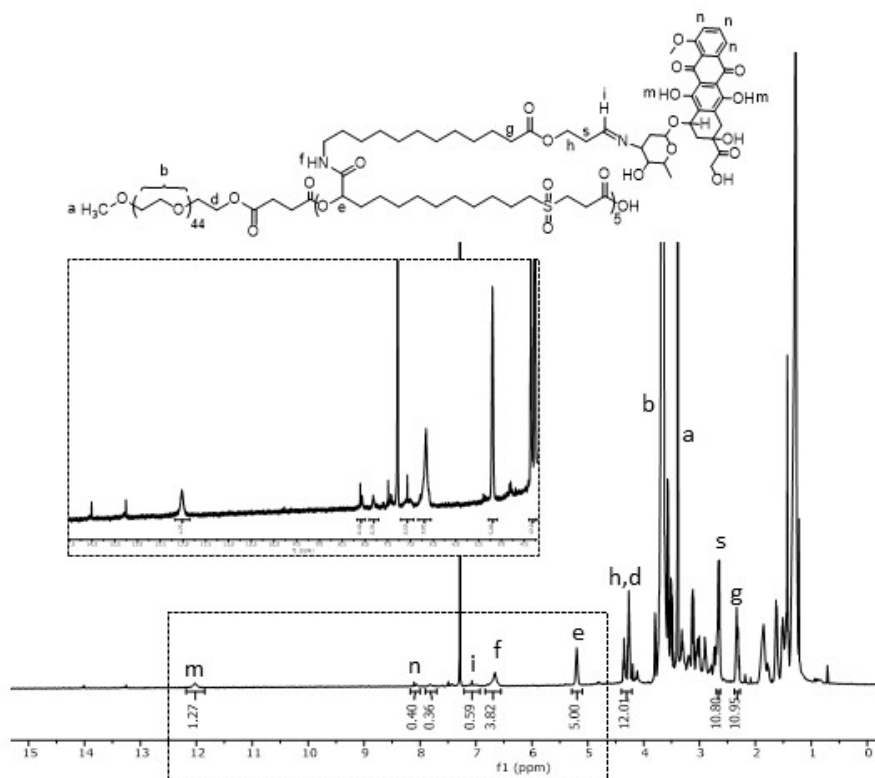

Figure S 13: Integrated <sup>1</sup>H NMR spectrum of Passerini diblock copolymer P4-Dox in CDCl<sub>3</sub>.

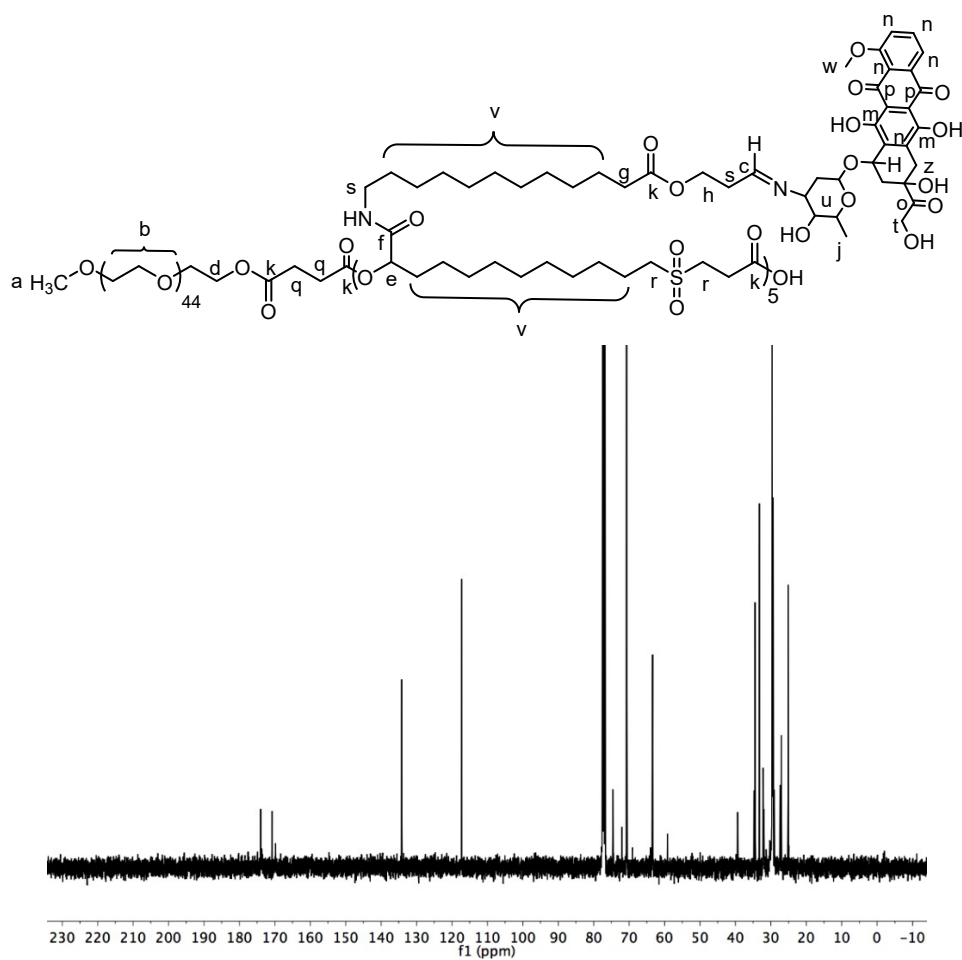

Figure S 14:  $^{13}\text{C}$  NMR of P4-Dox in  $\text{CDCl}_3$ .

| Polymer | Mn (g/mol) | $\bar{D}$ | $^1\text{H}$ NMR Mn (g/mol) |
|---------|------------|-----------|-----------------------------|
| P1      | 16000      | 1.55      | 11300                       |
| P2      | 3800       | 1.13      | 4900                        |
| P3      | 4700       | 1.11      | 5115                        |
| P4-Dox  | 7060       | 1.26      | 7000                        |

Table S 1: SEC characterization data in THF and the molecular weight calculated by  $^1\text{H}$  NMR of the P1, P2, P3 and P4-Dox Passerini-3CR copolymers.

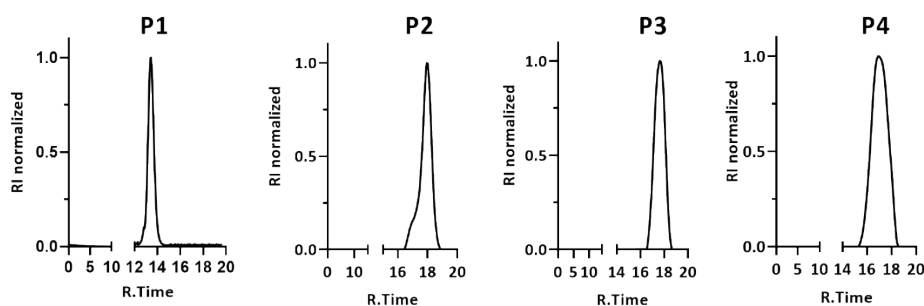

Figure S 15: SEC chromatogram in THF of of the P1, P2, P3 and P4-Dox Passerini-3CR copolymers.

## Formulation and characterization

### P1-Dox POLYMERSOMES FORMULATION

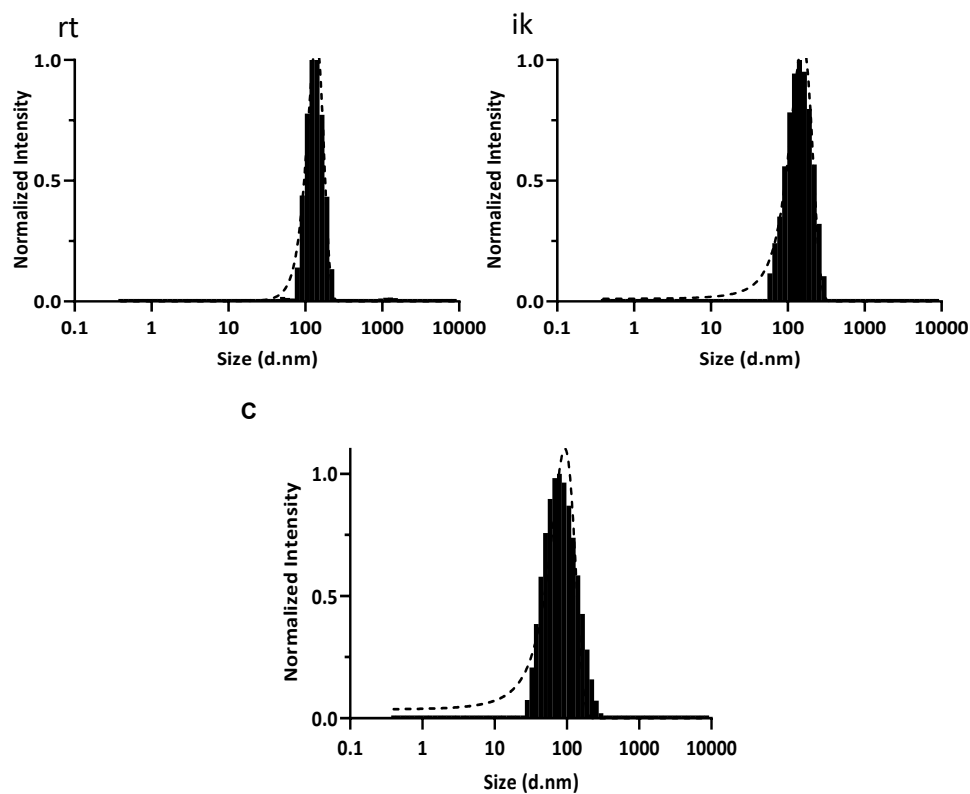

Figure S 16: DLS intensity data of polymersomes diameter (A) P1  $135 \text{ nm} \pm 33$ , (B) P1DOX  $146 \text{ nm} \pm 42$  AND (C) P1-Cy5  $91 \pm 46 \text{ nm}$ .

| Formulation               | diameter<br>nm |
|---------------------------|----------------|
| <b>P1 polymersome</b>     | 139 ± 32       |
| <b>P1-Cy5 polymersome</b> | 91 ± 46        |
| <b>P1-Dox</b>             | 146 ± 42       |

Table S 2: Characterization data of empty P1, P1-Cy5 and doxorubicin loaded polymersomes P1DOX.

### P3-Cy5 AND P4-Dox NANOPARTICLES FORMULATION

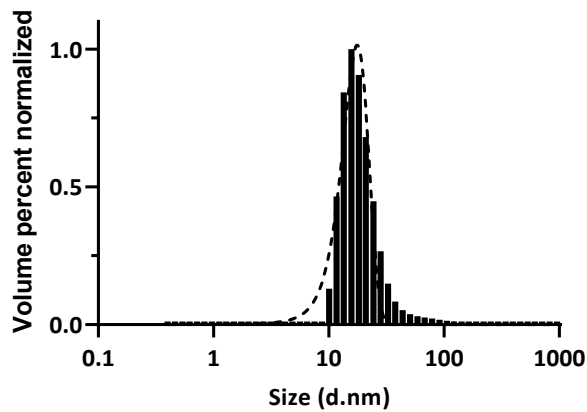

Figure S 17: DLS volume data of P3-Cy5 21 nm ± 7.

| Formulation                 | diameter<br>nm |
|-----------------------------|----------------|
| <b>P3-Cy5 nanoparticles</b> | 21 ± 7         |
| <b>P4-Dox</b>               | 16 ± 6         |

Table S 3: Characterization data of P3-Cy5 and P4-Dox nanoparticles.

### P1-Dox AND P4-Dox POLYMERSOMES DRUG LOADING AND ENCAPSULATION EFFICIENCY

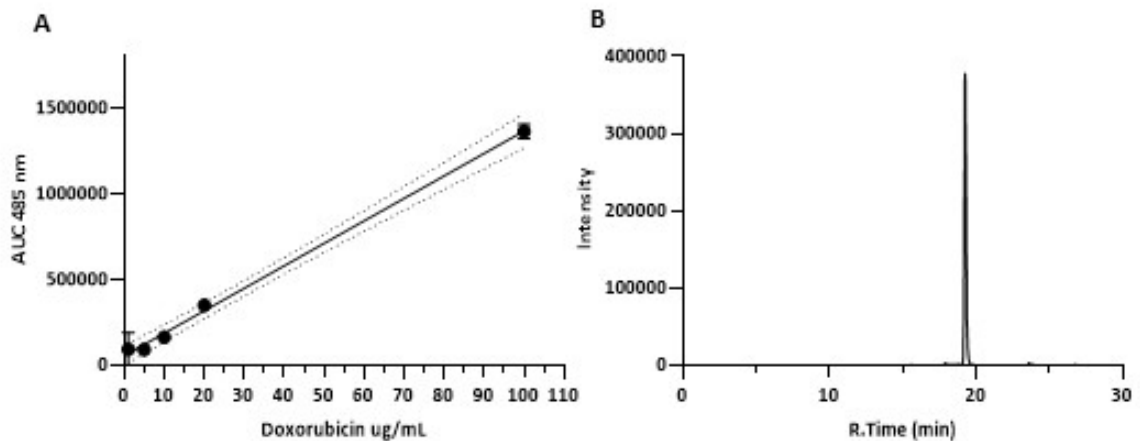

Figure S 18 (A) Doxorubicin hydrochloride calibration curve, UV detector 485 nm:  $Y=13100 \cdot X$ ,  $R^2=0.997$ . (B) Doxorubicin hydrochloride chromatogram UV detector 485 nm, RT=19.4 min

The drug loading and encapsulation efficiency were calculated using the following equations:

$$\text{Drug loading (\%)} = \frac{\text{Weight of loaded drug}}{\text{Total weight of polymersomes}} \times 100 \quad \text{Eq 1}$$

$$\text{Drug encapsulation \% (w/w)} = \frac{\text{Total amount of drug} - \text{Unloaded drug}}{\text{Total amount of drug}} \times 100 \quad \text{Eq 2}$$

### P1-Dox AND P4-Dox IN VITRO DRUG RELEASE

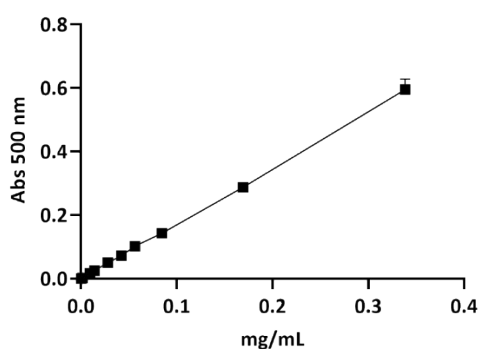

Figure S 19: Uv-Vis doxorubicin calibration curve in PBS pH 7.4:  $Y=1.7486x - 0.0006$ ;  $R^2= 0.9996$

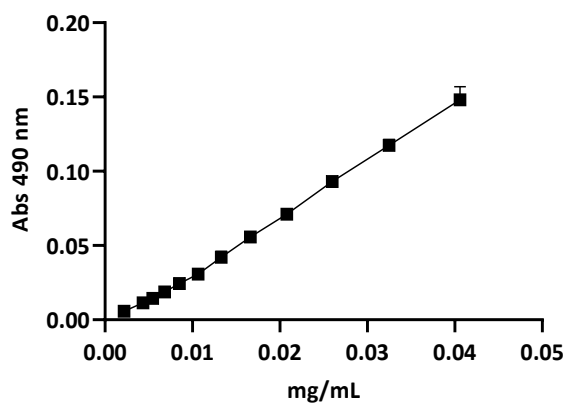

Figure S 20: Uv-Vis doxorubicin calibration curve in acetate buffer pH 5:  $Y=3.7889x - 0.0066$ ;  $R^2= 0.9984$

### Cell culture experiments

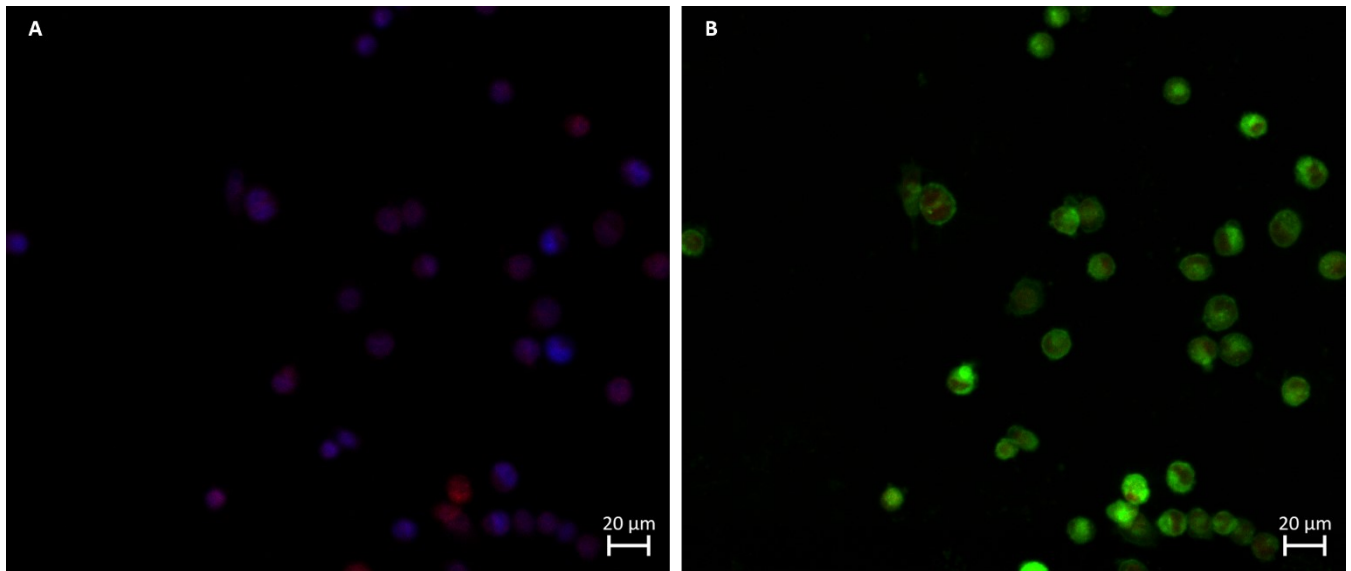

**Figure S 21:** Cellular uptake assessed by confocal microscopy of doxorubicin in MDA-MB-231 cells after 4 h incubation. (A) Superimposition of doxorubicin (Ex 480 nm/Em 590 nm) and nuclei stained with Hoechst 33342 (Ex 350 nm/Em 461 nm), (B) Superimposition of doxorubicin (Ex 480 nm/Em 590 nm) and Cell membrane stained with Cell Mask™ Deep Red plasma membrane stain (Ex 649 nm/Em 666 nm). Scale bar 20  $\mu$ m.

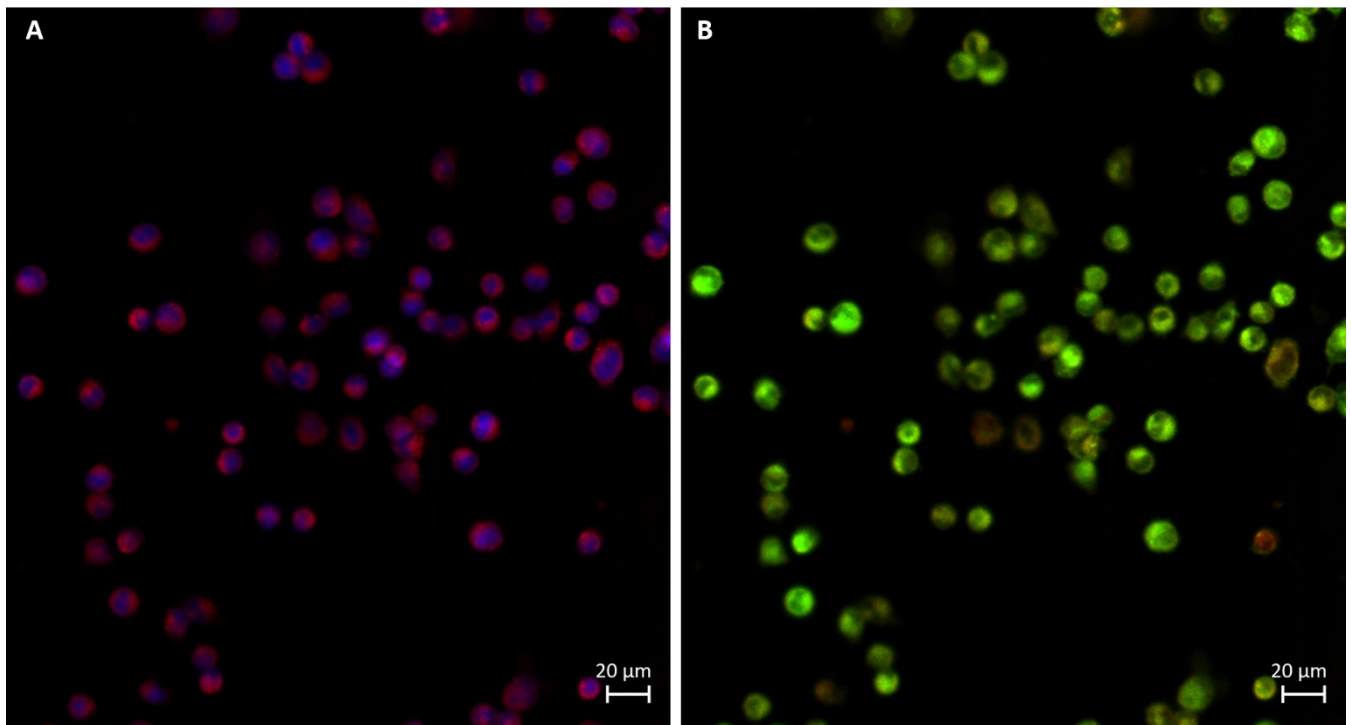

**Figure S 22:** Cellular uptake assessed by confocal microscopy of P4-Dox in MDA-MB-231 cells after 4 h incubation. (A) Superimposition of P4-Dox (Ex 480 nm/Em 590 nm) and nuclei stained with Hoechst 33342 (Ex 350 nm/Em 461 nm), (B) Superimposition of doxorubicin (Ex 480 nm/Em 590 nm) and cell membrane stained with Cell Mask™ Deep Red plasma membrane stain (Ex 649 nm/Em 666 nm). Scale bar 20  $\mu$ m.

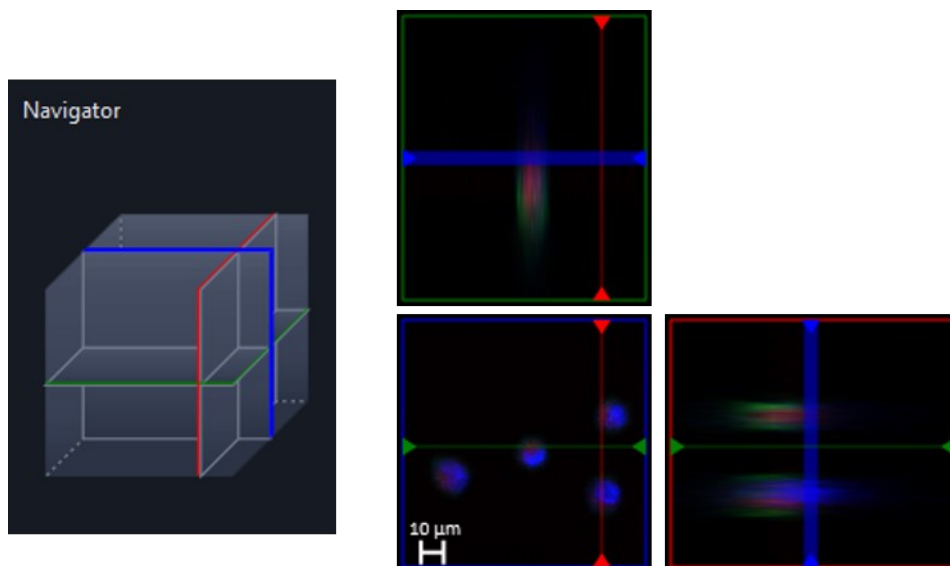

**Figure S 23:** Cellular uptake assessed by confocal microscopy of P1-Cy5 in MDA-MB-231 cells after 4 h incubation. Zeta-stack picture with x-y-z sections. Nuclei are stained blue (Hoechst 33342), membranes green (CellMask-Green) and polymers red (Cy5). Scale bar 10 μm. From the navigator: blue square X-Y, green square X-Z and red square Y-Z.

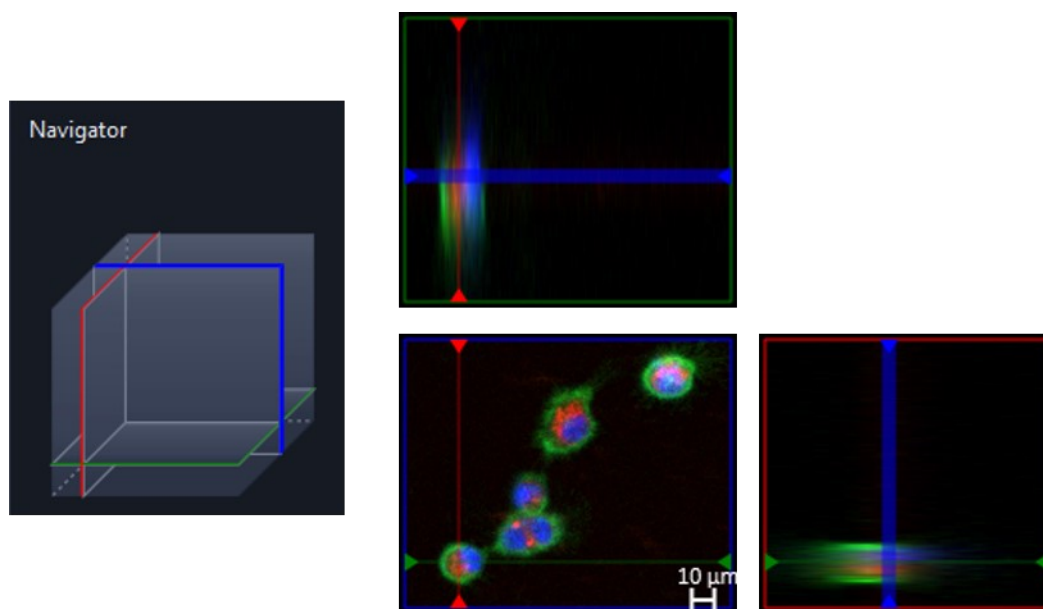

**Figure S 24:** Cellular uptake assessed by confocal microscopy of P3-Cy5 in MDA-MB-231 cells after 4 h incubation. Zeta-stack picture with x-y-z sections. Nuclei are stained blue (Hoechst 33342), membranes green (CellMask-Green) and polymers red (Cy5). Scale bar 10 μm. From the navigator: blue square X-Y, green square X-Z and red square Y-Z.

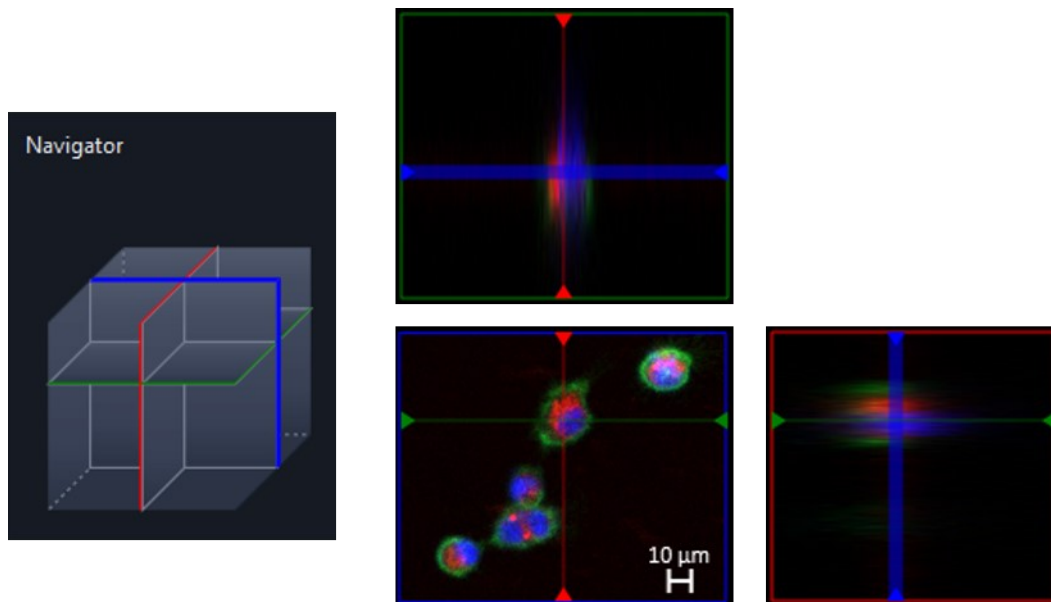

**Figure S 25:** Cellular uptake assessed by confocal microscopy of P3-Cy5 in MDA-MB-231 cells after 4 h incubation. Zeta-stack picture with x-y-z sections. Nuclei are stained blue (Hoechst 33342), membranes green (CellMask-Green) and polymers red (Cy5). Scale bar 10  $\mu$ m. From the navigator: blue square X-Y, green square X-Z and red square Y-Z.

### CELLULAR UPTAKE STUDIES WITH P1-CY5 AND P3-CY5 NANOPARTICLES

Flow cytometry

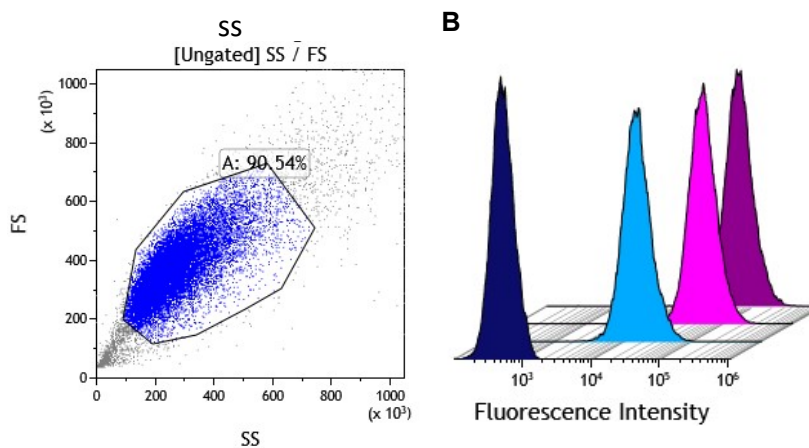

**Figure S 26:** Cellular uptake of Cy5-labelled P1-Cy5 polymersomes by flow cytometry in MDA-MB-231 triple negative breast cancer cells after 4 h of incubation. (A) Gate showing negative control MDA-MB-231 cells - an example of the cell population taken for the uptake experiments (B) FACS uptake histograms for P1-Cy5 polymersomes: in blue the negative control, in light blue P1-Cy5 2.29  $\mu$ M, in pink P1-Cy5 22.93  $\mu$ M and in purple P1-Cy5 47.85  $\mu$ M.

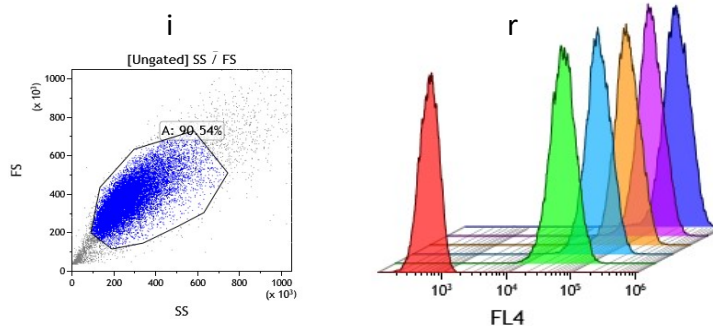



**Figure S 27:** Cellular uptake of P2-Cy5-labelled nanoparticles by MDA-MB-231 triple negative breast cancer cells after 4 h of incubation. (A) Gate showing negative control MDA-MB-231 cells - an example of the cell population taken for the uptake experiments. (B) FACS uptake histograms for P3-Cy5-labelled nanoparticles: 5µg/mL (green), 10µg/mL (light blue), 15µg/mL (orange), 20µg/mL (purple), 25µg/mL (blue); untreated cells (red). Data are representative of three experiments (n=3) (\*p<0.05, t-test).

**3D tumor TNBC spheroids**

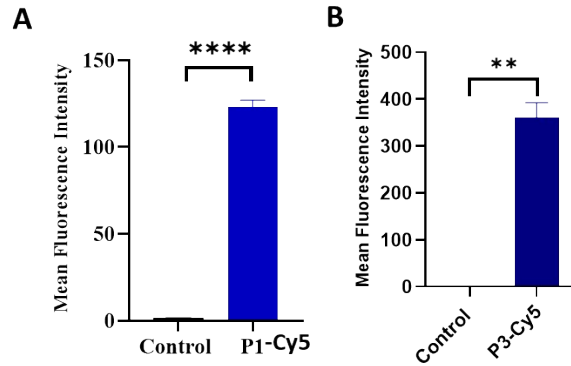

**Figure S 28:** Quantification of Mean Fluorescence Intensity of the untreated cells (control) and cells treated with P1-Cy5 (A) and P3\_Cy5 (B) labelled nanoparticles in TNBC spheroids. Data are representative of three experiments (\*p<0.05, t-test).

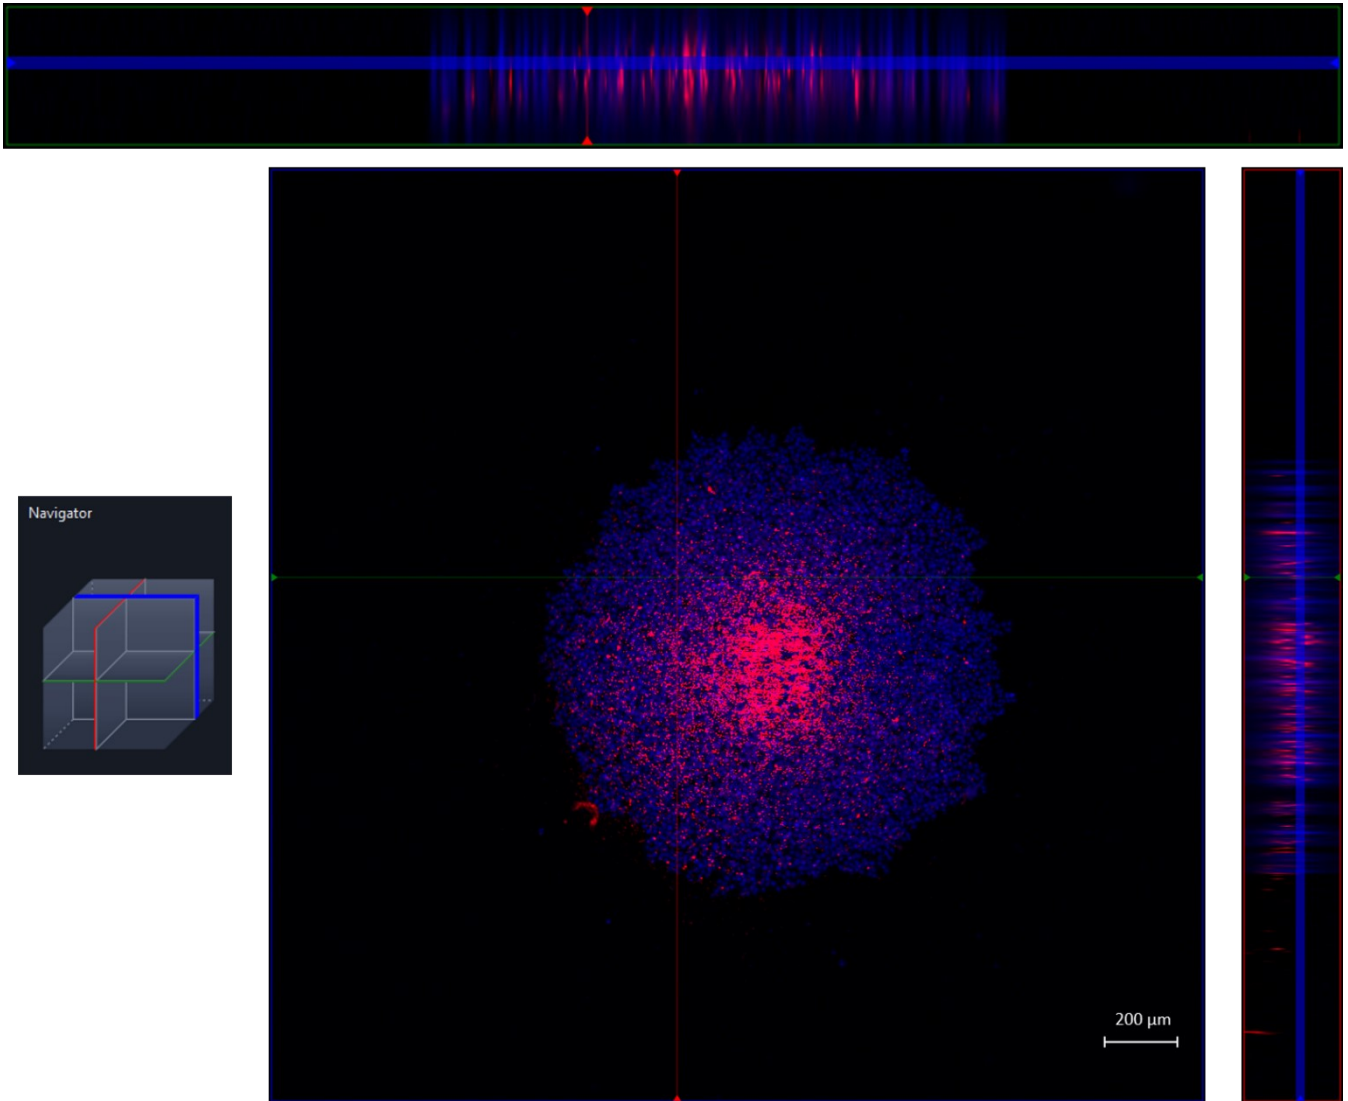

**Figure S 29:** Cellular uptake assessed by confocal microscopy of P1-Cy5 in MDA-MB-231 3D spheroids. Zeta-stack picture with x-y-z sections. Nuclei are stained blue (Hoechst 33342) and polymers red (Cy5). Scale bar 200 µm. From the navigator: blue square X-Y, green square X-Z and red square Y-Z.

P1 Ortho image

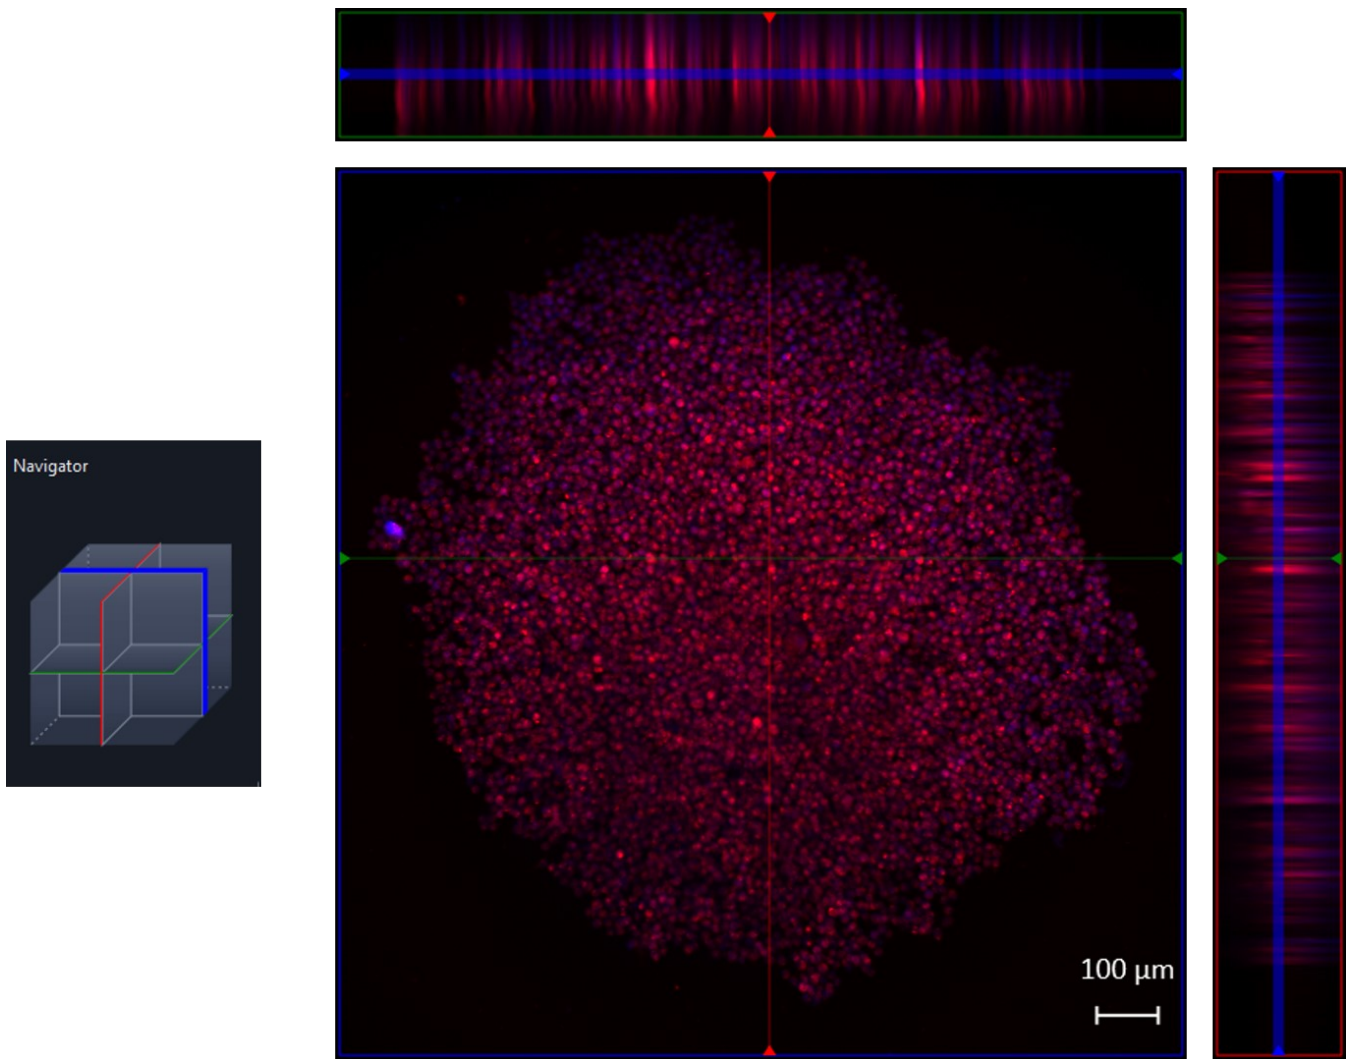

**Figure S 30:** Cellular uptake assessed by confocal microscopy of P3-Cy5 in MDA-MB-231 3D spheroids. Zeta-stack picture with x-y-z sections. Nuclei are stained blue (Hoechst 33342) and polymers red (Cy5). Scale bar 200 μm. From the navigator: blue square X-Y, green square X-Z and red square Y-Z.

**Cell metabolic activity assays**

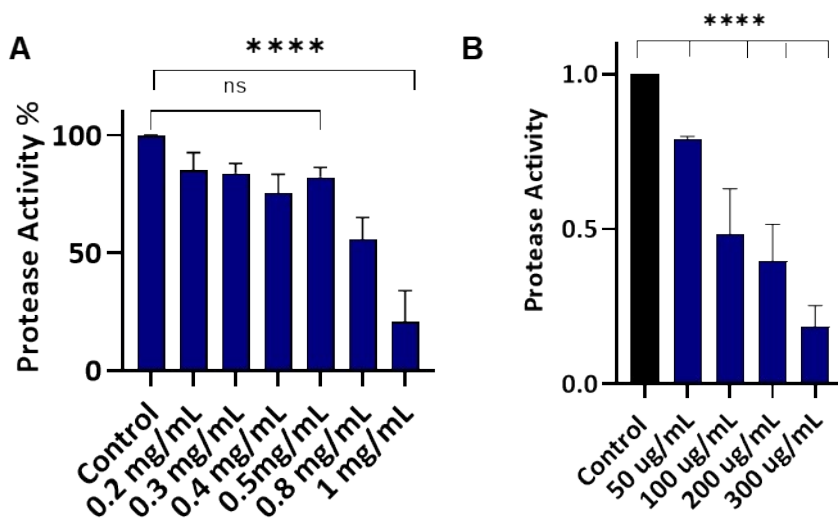

**Figure S 23:** Protease activity of MDA-MB-231 cells treated with P1- (A) and P3 (B) polymers. Data are representative of three experiments (\* $p < 0.05$ , t-test).

## Statistical analysis

Unless otherwise stated, all data are shown as mean  $\pm$  standard deviation (SD). Two way analysis of variance (ANOVA) was applied for comparison of three or more group means (Tukey's multiple comparisons test). A P value of  $< 0.05$  was considered statistically significant. \*\*\*\*, \*\*\*, \*\*, and \* display  $p < 0.0001$ ,  $p < 0.001$ ,  $p < 0.01$ , and  $p < 0.05$ , respectively. GraphPad Prism 8.1 software was used for data analysis.

## References

- [1] S. Oelmann, A. Travanut, D. Barther, M. Romero, S. M. Howdle, C. Alexander, M. A. R. Meier, *Biomacromolecules* **2019**, *20*, 90-101.
- [2] A. Travanut, P. F. Monteiro, S. Oelmann, S. M. Howdle, A. M. Grabowska, P. A. Clarke, A. A. Ritchie, M. A. R. Meier, C. Alexander, *Macromolecular Rapid Communications* **2020**, *n/a*, 2000321.
- [3] N. Xiao, H. Liang, J. Lu, *Soft Matter* **2011**, *7*, 10834-10840.
- [4] a) X. Li, D. J. Hirsh, D. Cabral-Lilly, A. Zirkel, S. M. Gruner, A. S. Janoff, W. R. Perkins, *Biochimica et Biophysica Acta (BBA) - Biomembranes* **1998**, *1415*, 23-40; b) A. Choucair, P. Lim Soo, A. Eisenberg, *Langmuir* **2005**, *21*, 9308-9313.
- [5] R. R. Larson, M. B. Khazaeli, H. K. Dillon, *Applied Occupational and Environmental Hygiene* **2003**, *18*, 109-119.
- [6] J. A. Anderson, S. Lamichhane, T. Remund, P. Kelly, G. Mani, *Acta Biomaterialia* **2016**, *29*, 333-351.
- [7] V. Knorr, V. Russ, L. Allmendinger, M. Ogris, E. Wagner, *Bioconjugate Chemistry* **2008**, *19*, 1625-1634.
- [8] a) C. Battistella, H.-A. Klok, *Macromolecular Bioscience* **2017**, *17*, 1700022; b) Y. Zhang, C. Yang, W. Wang, J. Liu, Q. Liu, F. Huang, L. Chu, H. Gao, C. Li, D. Kong, Q. Liu, J. Liu, *Scientific Reports* **2016**, *6*.
- [9] M. Gulfam, T. Matini, P. F. Monteiro, R. Riva, H. Collins, K. Spriggs, S. M. Howdle, C. Jérôme, C. Alexander, **2017**.

## Author Contributions

**Alessandra Travanut:** data curation, formal analysis, investigation, project administration, validation, writing of original draft and lead.

**Patrícia F. Monteiro:** data acquisition, analysis and method development support,

**Sean Smith:** ozonolysis reaction

**Steven M. Howdle:** project administration support, supervision

**Anna M. Grabowska:** project administration support, supervision

**Barrie Kellam:** project administration support

**Michael A. R. Meier:** project administration support, draft revision and editing

**Cameron Alexander:** project administration, validation, funding acquisition, draft revision and editing, lead.
